# Supplementary material for: Variation in Rubisco activase (RCAβ) gene promoters and expression in soybean [Glycine max (L.) Merr.]
Source: PubMed Central journal article supplement (PMC3883283; doi:10.1093/jxb/ert346), 2013-10-29
Supplement: supp_ert346_ert346_supplementary.pdf [file supp_ert346_ert346_supplementary.pdf]

## Supplementary Data

### Figure Legends

**Figure S1.** The geographic distributions of landraces used in this study. Each circle represents a different province. The number of landraces per province is indicated by closed portion of the circle. The four colored portions divide China into four regions: NER (northeast region), NR (north region), HR (Huanghuai region) and SR (south region).

**Figure S2.** Multiple sequence alignment result of promoter sequences of *GmRCA $\alpha$*  and *GmRCA $\beta$*  by ClustalX v.1.83 program. A 2300-bp fragment upstream of the ATG start codon was designated as the promoter region.

**Figure S3.** The expression levels of two RCA genes in the natural population. A. The distribution of the expression levels of two RCA genes in each landrace. B. A comparison of the average value of two RCA genes in 219 soybean landraces.

**Figure S4.** Sequence analysis of the *GmRCA $\beta$*  promoter in soybean. A 2300-bp fragment upstream of the ATG start codon of *GmRCA $\beta$*  was designated as the promoter region. Parts of the putative cis-regulatory elements are noted under the sequences in shadow letters. The ATG is indicated in red. The nucleotide at position +1 (bold A in the gray box) is the ATG start codon. The polymorphism sites are underlined, and the cis-acting elements located in polymorphism sites are indicated in yellow.

**Figure S5.** Sequence analysis of the *GmRCA $\alpha$*  promoter in soybean. A 2300-bp fragment upstream of the ATG start codon of *GmRCA $\alpha$*  was designated as the promoter region. Parts of the putative cis-regulatory elements are noted under the sequences in shadow letters. The ATG is indicated in red. The nucleotide at position +1 (bold A in the gray box) is the ATG start codon.

**Figure S6.** Phylogenetic analysis of *GmRCA $\beta$*  promoter sequence. The tree was constructed with the Bayesian approaches using MrBayes v3.1.

**Figure S7.** PCR product and restriction analysis of 1381Z-GroupA promoter, 1381Z-GroupB promoter. A. Amplified products of genomic DNA of different *GmRCA $\beta$*  promoter sequence in soybean. B. Vector pCAMBIA1381Z restriction results.

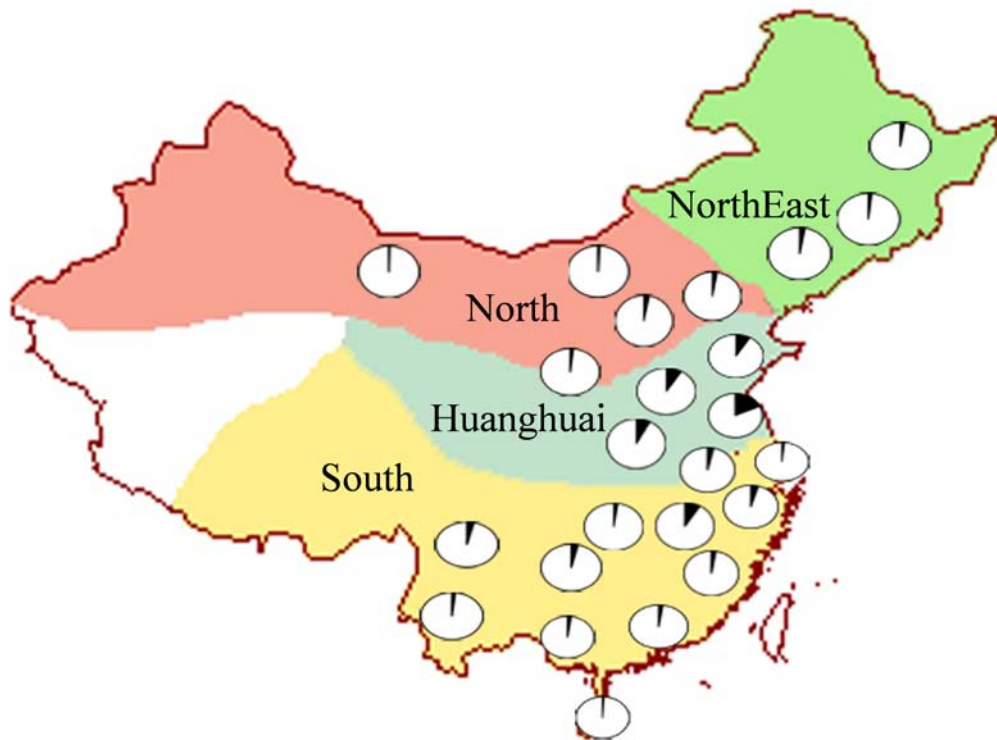

Figure S1. The geographic distributions of landraces used in this study. Each circle represents a different province. The number of landraces per province is indicated by closed portion of the circle. The four colored portions divide China into four regions: NER (northeast region), NR (north region), HR (Huanghuai region) and SR (south region).



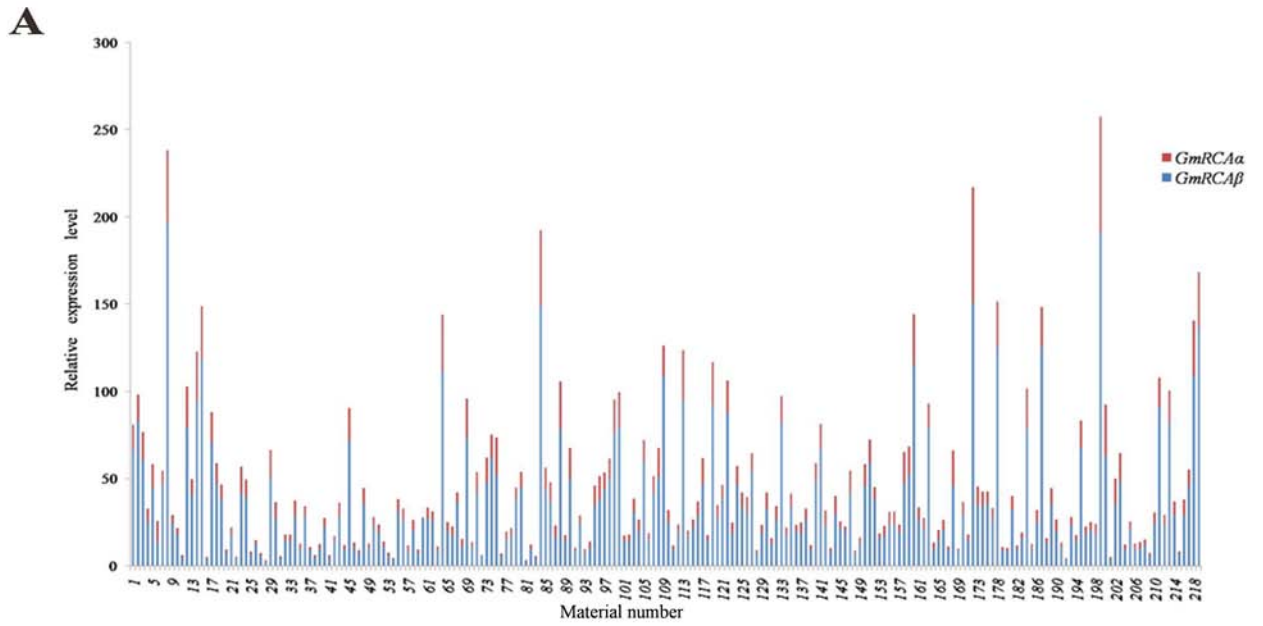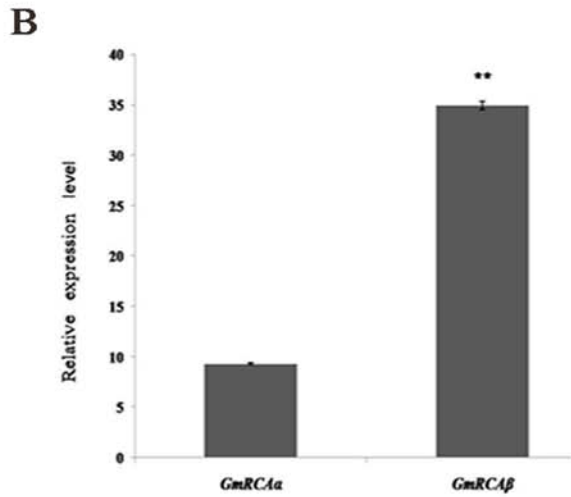

Figure S3. The expression levels of two RCA genes in the natural population. A. The distribution of the expression levels of two RCA genes in each landraces. B. A comparison of the average value of two RCA genes in 219 soybean landraces.

*GmRCAB* promoter region

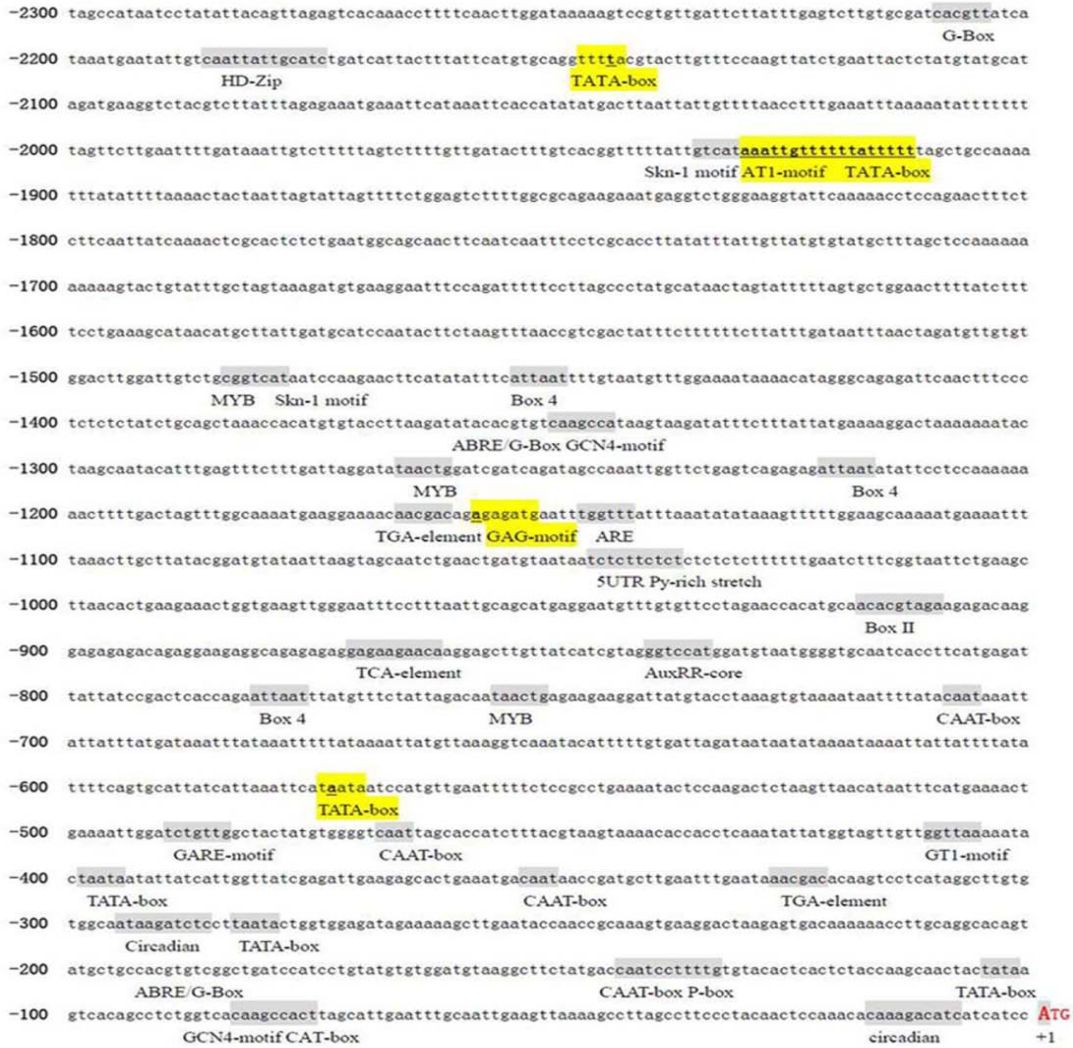

Figure S4. Sequence analysis of the *GmRCAB* promoter in soybean. A 2300-bp fragment upstream of the ATG start codon of *GmRCAB* was designated as the promoter region. Parts of the putative cis-regulatory elements are noted under the sequences in shadow letters. The ATG is indicated in red. The nucleotide at position +1 (bold A in the gray box) is the ATG start codon. The polymorphism sites are underlined, and the cis-acting elements located in polymorphism sites are indicated in yellow.

*GmRCA*  $\alpha$  promoter region

```

-2300 attaatagtaaatatTTTTgtgaaTTTgttatttactaaataattatataTTAAAagTtaattTTaaataattgtgtaaaaagaatcagtcacatt
      Box 4
-2200 aacgcatctttggatctgttccaatctaaaaatgTTTgaaataaaatcaattcaagattatgcttaattTTTgaaagactttcggacactTTTgca
-2100 aacacaatttacaacataggtTTaacccaaaattgagTtaaaaaTTTtaagTcaaacatgcacttaaacatattgattTTaattTTaaatccaacctga
      HSE circadian
-2000 tctaataaaaaataattgaaTTTgttTTTgattTTTtaaaaactaaatagTtaaaaaataatgattTTTTtattatcttTgctgtagtaaaaaatt
-1900 gattaactTTTgcaatataataattcacaataacttaactgcactatctttaaagatctcttaaatacaaaactcagatagtgagaccgagtcgca
      Box 4
-1800 atacattactactagaactaagatagctggtgTTgaaataatgaattgataaacTagaagTaaattacaatattaaaatttaattcacaagcta
-1700 attcetaaaatattattataattaaagatgataaaataaatatagTTTtagaattattTTTTgtccttctcattcaccatcatcacaaaaaaggTg
      GA-motif
-1600 ggatcggtagTTTattccaaaaatagattgaaaaggTcaacttagcttctTTTTTTTaaaccattcacgggccgatggatcatgaatgtacatgaaa
-1500 ataggaatgaaataaaataagaaatgTTTaaataaaaaggaaatgcatggtggagTgaaggTatgagaccactcatTTTTTgaaTTTTTTTTCTCTC
      5'UTR Py-rich stretch
-1400 gcctattTTTTtaccatcaaacTcacctttagataaagatgtcttatgctcaattTaaagaccaaaacttatgaaaaaaatgctTTTggtgaaatgTg
      I-box
-1300 ccgtagtaaaaaaaatgaattgaaaattaagaattctaaTTTTTgagggagaatcacgggaccagcctcggtctgTggttgagatagagcatgt
-1200 tgcgagacctatgaattggatattTTTTaatTcaactTTTTTtcttccataatcagTacttagactatttctacatgaattTTTtatacactatt
-1100 taagaatttaataaacctgcactTTttagtaagagTtcaTTTgaattcactagTgTTTTaaataaactcttactTTTTTTTataaaaaaatat
      Box 4 TCT-motif
-1000 tctaaactgcaatacaaaaggctagTtaggattaaataaatcactgctgTtaattgacTcaaaatacaaaacagaataaaacaagTtatgttacaaaatg
      GARE-motif
-900 tcatcttatgatagcagTtaattTggaaggactagctctggaacctcaattatagcatgggcatgctTggagcacataaaggatgtatacacttaacaa
      Skn-1_motif
-800 taagacaggagaggcacataaaaagctgaaaaaatcacctTgtgTcatcTTTgccccctTTTgaaccgggagTggagggggtcattacatcatc
      Sp1 Skn-1_motif
-700 tcaatcaaccactatcctTgTTtcttattaatgcaatggcccactTTTTgacataattcataattTTTTTcaacatcattgctactTgtgTgggTtag
      Box 4
-600 catgctaaaaatctaaaataaattggcagcccagccagattTTTatgTaatgaccaatacaaaattagaaaaaaatTatgcagTaaaaaTTTTTac
      Box-W1 ATGCAAAT motif HSE
-500 atTTTctttaattaaCTTTaactTTTatgataattactTaaaaaattatattaagaacgaaTtatgattTacaataatgTaaagTgtgTaaacaatt
      chs-CMA1a TATA-box
-400 aaattctagaatattatagTgtTgTgctgaacaattTctctcttagTgaaagcaaacTtagccaatgTtgatcctgatgagatgaatgctacaagc
      TATA-box O2-site
-300 tacgtgTgTaacaaatctcctTgaaactTatggatcagaaaaggctTcaattccaacctcaagatctatggatgtagTggtTgTgagacctggaa
      ABRE/ G-Box CAAT-box CAAT-box
-200 TgcaactatgtagTgccagTggcagccaagctaattctcatcgtgTggatgTtaaggattctacaactagTTTgaggatagTaaTTTctgaacaactca
      Box II/ABRE/G-Box ATCT-motif/ circadian GTGGC-motif CAAT-box
-100 attgcaactgccataagTccctccctattgTaaTTTctgcccagcctcaaaaaagactTgctctgctctgccactctctgagtaggactacactgccATG
      CAT-box +1

```

Figure S5. Sequence analysis of the *GmRCA* $\alpha$  promoter in soybean. A 2300-bp fragment upstream of the ATG start codon of *GmRCA* $\alpha$  was designated as the promoter region. Parts of the putative cis-regulatory elements are noted under the sequences in shadow letters. The ATG is indicated in red. The nucleotide at position +1 (bold A in the gray box) is the ATG start codon.

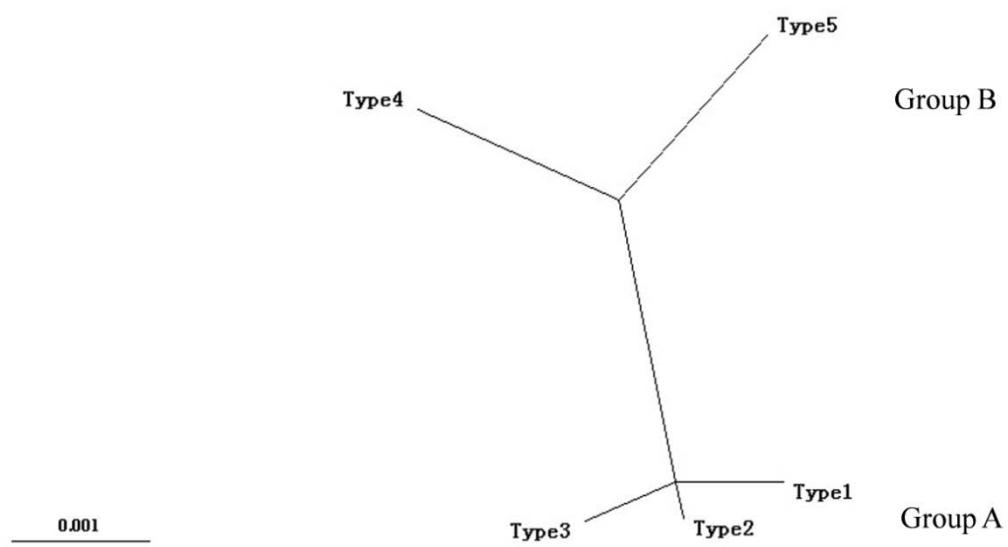

Figure S6. Phylogenetic analysis of *GmRCAβ* promoter sequence. The tree was constructed with the Bayesian approaches using MrBayes v3.1.

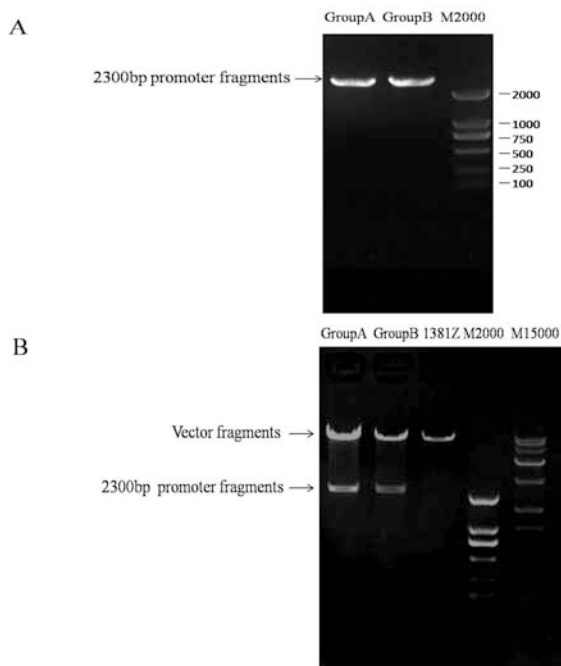

Figure S7. PCR product and restriction analysis of 1381Z-GroupA promoter,1381Z-GroupB promoter.  
 A. Amplified products of genomic DNA of soybean different *GmRCAβ* promoter sequence. B. Vector pCAMBIA1381Z restriction results.



**Table S1.**The descriptive statistics and variance analysis of *GmRCA $\alpha$*  expression and *GmRCA $\beta$*  expression in natural population

| Traits                                        | Descriptive statistics |             |       | Variance analysis   |     |               |                |         |
|-----------------------------------------------|------------------------|-------------|-------|---------------------|-----|---------------|----------------|---------|
|                                               | Mean                   | Range       | SD    | Source of variation | df  | Sum of square | Mean of square | P value |
| <i>GmRCA<math>\alpha</math></i><br>expression | 9.26                   | 0.47-66.41  | 9.6   | Among landraces     | 217 | 60336.78      | 278.05         | <0.001  |
|                                               |                        |             |       | Block(time segment) | 2   | 3.32          | 1.66           | <0.05   |
|                                               |                        |             |       | Error               | 434 | 171.77        | 0.4            |         |
|                                               |                        |             |       | Total               | 653 | 60511.87      | 280.11         |         |
| <i>GmRCA<math>\beta</math></i><br>expression  | 34.65                  | 2.38-196.49 | 33.36 | Among landraces     | 217 | 742218.73     | 3420.36        | <0.001  |
|                                               |                        |             |       | Block(time segment) | 2   | 73.8          | 36.9           | <0.001  |
|                                               |                        |             |       | Error               | 434 | 2086.55       | 4.81           |         |
|                                               |                        |             |       | Total               | 653 | 744379.08     | 3462.07        |         |

**Table S2.** Regression coefficients among *GmRCA $\alpha$*  expression, *GmRCA $\beta$*  expression and yield components in a natural soybean population

| Traits                                     | Fv/Fm <sup>a</sup> | $\Phi_{\text{PSII}}$ <sup>b</sup> | qP <sup>c</sup> | NPQ <sup>d</sup> | Seed weight | Seed yield |
|--------------------------------------------|--------------------|-----------------------------------|-----------------|------------------|-------------|------------|
| <i>GmRCA<math>\beta</math></i> expression  | ns                 | 0.0003*                           | 0.0004**        | ns               | 0.027*      | 0.025**    |
| <i>GmRCA<math>\alpha</math></i> expression | ns                 | 0.001*                            | 0.001**         | ns               | ns          | 0.073**    |

<sup>a</sup> Fv/Fm: maximum quantum yield of PSII primary photochemistry in the dark-adapted state; <sup>b</sup>  $\Phi_{\text{PSII}}$ : actual quantum yield in the light-adapted state; <sup>c</sup> qP: photochemical quenching coefficient; <sup>d</sup> NPQ: non-photochemical quenching parameter describing the regulated dissipation of excess energy; ns: not significant; \*,  $P < 0.05$ ; \*\*,  $P < 0.01$ .

**Table S3** The putative cis-acting elements and functions predicted by PlantCARE in the *GmRCAβ*

promoter

| Elements type | Names of the elements       | Organism                       | Motif sequence                 | Function                                                                |
|---------------|-----------------------------|--------------------------------|--------------------------------|-------------------------------------------------------------------------|
| Light         | AT1-motif                   | <i>Solanum tuberosum</i>       | AATTATTTTTTATT                 | part of a light-responsive module                                       |
|               | Box 4                       | <i>Petroselinum crispum</i>    | ATTAAT                         | part of a conserved DNA module involved in light responsiveness         |
|               | Box II                      | <i>Arabidopsis thaliana</i>    | ACACGTAGA                      | part of a light-responsive element                                      |
|               | GAG-motif                   | <i>Spinacia oleracea</i>       | AGAGATG                        | part of a light-responsive element                                      |
|               | GT1-motif                   | <i>Arabidopsis thaliana</i>    | GGTTAA                         | light-responsive element                                                |
|               | G-Box                       | <i>Pisum sativum</i>           | CACGTT                         | cis-acting regulatory element involved in light responsiveness          |
|               |                             | <i>Brassica napus</i>          | ACACGTGT                       |                                                                         |
|               |                             | <i>Antirrhinum majus</i>       | CACGTA                         |                                                                         |
|               | <i>Arabidopsis thaliana</i> | CACGTG                         |                                |                                                                         |
| Circadian     | circadian                   | <i>Lycopersicon esculentum</i> | CAAAGATATC                     | cis-acting regulatory element involved in circadian control             |
| Phytohormone  | ABRE                        | <i>Arabidopsis thaliana</i>    | CACGTG                         | cis-acting element involved in the abscisic acid responsiveness         |
|               | AuxRR-core                  | <i>Nicotiana tabacum</i>       | GGTCCAT                        | cis-acting regulatory element involved in auxin responsiveness          |
|               | TGA-element                 | <i>Brassica oleracea</i>       | AACGAC                         | auxin-responsive element                                                |
|               | TCA-element                 | <i>Brassica oleracea</i>       | GAGAAGAATA                     | cis-acting element involved in salicylic acid responsiveness            |
|               | P-box                       | <i>Oryza sativa</i>            | CCTTTTG                        | gibberellin-responsive element                                          |
|               | GARE-motif                  | <i>Brassica oleracea</i>       | TCTGTTG                        | gibberellin-responsive element                                          |
| Basal element | CAAT-box                    | <i>Glycine max</i>             | CAATT                          | common cis-acting element in promoter and enhancer regions              |
|               |                             | <i>Hordeum vulgare</i>         | CAAT                           |                                                                         |
|               |                             | <i>Arabidopsis thaliana</i>    | CCAAT                          |                                                                         |
|               |                             | <i>Arabidopsis thaliana</i>    | TATA                           |                                                                         |
|               | TATA-box                    | <i>Brassica napus</i>          | ATATAT                         | core promoter element around -30 of transcription start                 |
|               |                             | <i>Lycopersicon esculentum</i> | TTTTA                          |                                                                         |
|               |                             | 5UTR                           | <i>Lycopersicon esculentum</i> | TTTCTTCTCT                                                              |
| Biotic stress | MBS                         | <i>Zea mays</i>                | CGGTCA                         | MYB binding site                                                        |
|               |                             | <i>Arabidopsis thaliana</i>    | TAACTG                         | MYB binding site involved in drought-inducibility                       |
|               | ARE                         | <i>Zea mays</i>                | TGGTTT                         | cis-acting regulatory element essential for the anaerobic induction     |
| Other         | Skn-1_motif                 | <i>Oryza sativa</i>            | GTCAT                          | cis-acting regulatory element required for endosperm expression         |
|               | CAT-box                     | <i>Arabidopsis thaliana</i>    | GCCACT                         | cis-acting regulatory element related to meristem expression            |
|               | GCN4_motif                  | <i>Oryza sativa</i>            | CAAGCCA                        | cis-regulatory element involved in endosperm expression                 |
|               | HD-Zip                      | <i>Arabidopsis thaliana</i>    | CAAT(A/T)ATTG                  | element involved in the differentiation of the palisade mesophyll cells |
|               |                             |                                | CAAT(G/C)ATTG                  | element involved in the control of leaf morphology development          |

**Table S4.** The putative cis-acting elements and functions predicted by PlantCARE in the *GmRCAa*

promoter

| Elements type               | Names of the elements | Organism                         | Motif sequence | Function                                                             |
|-----------------------------|-----------------------|----------------------------------|----------------|----------------------------------------------------------------------|
| Light                       | GA-motif:             | <i>Helianthus annuus</i>         | AAAGATGA       | part of a light responsive element                                   |
|                             | I-box                 | <i>Nicotiana plumbaginifolia</i> | CTCTTATGCT     | part of a light responsive element                                   |
|                             |                       | <i>Solanum tuberosum</i>         | TATTATCTAGA    |                                                                      |
|                             | ATCT-motif            | <i>Arabidopsis thaliana</i>      | AATCTAATCT     | part of a conserved DNA module involved in light responsiveness      |
|                             | Box II                | <i>Petroselinum crispum</i>      | CCACGTGGC      | part of a light responsive element                                   |
|                             | Sp1                   | <i>Zea mays</i>                  | CC(G/A)CCC     | light responsive element                                             |
|                             | TCT-motif             | <i>Arabidopsis thaliana</i>      | TCTTAC         | part of a light responsive element                                   |
|                             | chs-CMA1a             | <i>Daucus carota</i>             | TTACTTAA       | part of a light responsive element                                   |
|                             | GTGGC-motif           | <i>Arabidopsis thaliana</i>      | CATCGTGTGGC    | part of a light responsive element                                   |
|                             | Box 4                 | <i>Petroselinum crispum</i>      | ATTAAT         | part of a conserved DNA module involved in light responsiveness      |
|                             | G-Box                 | <i>Pisum sativum</i>             | CACGTG         | cis-acting regulatory element involved in light responsiveness       |
| <i>Daucus carota</i>        |                       | TACGTG                           |                |                                                                      |
| <i>Arabidopsis thaliana</i> |                       | CACGTG                           |                |                                                                      |
| Circadian                   | circadian             | <i>Lycopersicon esculentum</i>   | CAAAGATATC     | cis-acting regulatory element involved in circadian control          |
| Phytohormone                | ABRE                  | <i>Arabidopsis thaliana</i>      | TACGTG         | cis-acting element involved in the abscisic acid responsiveness      |
|                             |                       |                                  | CACGTG         |                                                                      |
| ACGTGGC                     |                       |                                  |                |                                                                      |
|                             | GARE-motif            | <i>Brassica oleracea</i>         | AAACAGA        | gibberellin-responsive element                                       |
| Biotic stress               | HSE                   | <i>Brassica oleracea</i>         | AAAAAAT TTC    | cis-acting element involved in heat stress responsiveness            |
|                             | Box-W1                | <i>Petroselinum crispum</i>      | TTGACC         | fungal elicitor responsive element                                   |
| Basal element               | CAAT-box              | <i>Glycine max</i>               | CAATT          | common cis-acting element in promoter and enhancer regions           |
|                             |                       | <i>Hordeum vulgare</i>           | CAAT           |                                                                      |
|                             |                       | <i>Arabidopsis thaliana</i>      | CCAAT          |                                                                      |
|                             | TATA-box              | <i>Arabidopsis thaliana</i>      | TATA           | core promoter element around -30 of transcription start              |
|                             |                       | <i>Brassica napus</i>            | ATATAT         |                                                                      |
|                             | 5UTR Py-rich stretch  | <i>Lycopersicon esculentum</i>   | TTTCTTCTCT     | cis-acting element conferring high transcription levels              |
| Other                       | ATGCAAAT motif        | <i>Oryza sativa</i>              | ATACAAAT       | cis-acting regulatory element associated to the TGAGTCA motif        |
|                             | CAT-box               | <i>Arabidopsis thaliana</i>      | GCCACT         | cis-acting regulatory element related to meristem expression         |
|                             | O2-site               | <i>Zea mays</i>                  | GATGACATGA     | cis-acting regulatory element involved in zein metabolism regulation |
|                             | Skn-1_motif           | <i>Oryza sativa</i>              | GTCAT          | cis-acting regulatory element required for endosperm expression      |
